# Supplementary material for: Immunity to Influenza is dependent on MHC II polymorphism: study with 2 HLA transgenic strains
Source: PubMed Central journal article supplement (PMC6911063; doi:10.1038/s41598-019-55503-1), 2019-12-13
Supplement: 41598_2019_55503_MOESM1_ESM.pdf [file 41598_2019_55503_MOESM1_ESM.pdf]

## **Immunity to Influenza is dependent on MHC II polymorphism: study with 2 HLA transgenic strains**

David Luckey<sup>1</sup>, Eric Weaver<sup>1#</sup>, Douglas G Osborne<sup>1†</sup>, Daniel D Billadeau<sup>1</sup> and Veena Taneja<sup>1\*</sup>

<sup>1</sup> Department of Immunology Mayo Clinic, Rochester, MN

### **\*Corresponding author**

Veena Taneja

Department of Immunology

Mayo Clinic,

200 First Street, SW

Rochester, MN 55905

Email: [taneja.veena@mayo.edu](mailto:taneja.veena@mayo.edu)

Ph: 507 284 4541

Present address

# School of Biological Sciences, Nebraska Center for Virology, University of Nebraska,

Lincoln, NE† Department of Dermatology, University of Colorado, Aurora, CO

## Supplementary Figure1

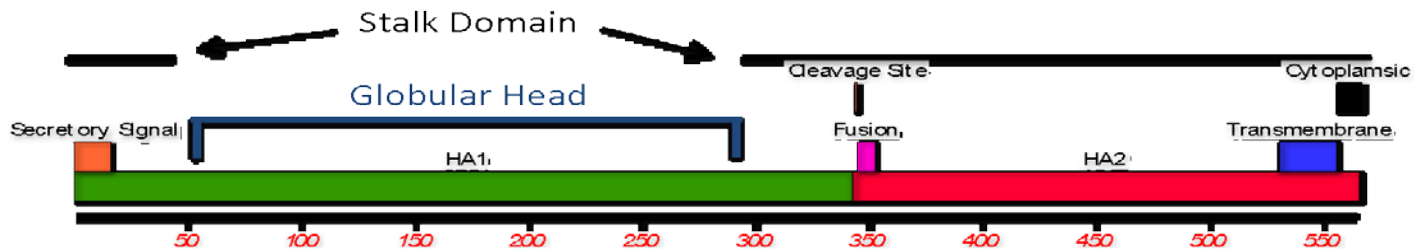

Recombinant Ad5- $\Delta$ E1/3 virus expressing the full-length hemagglutinin of influenza A/PR/8/34

## Supplementary Figure 2

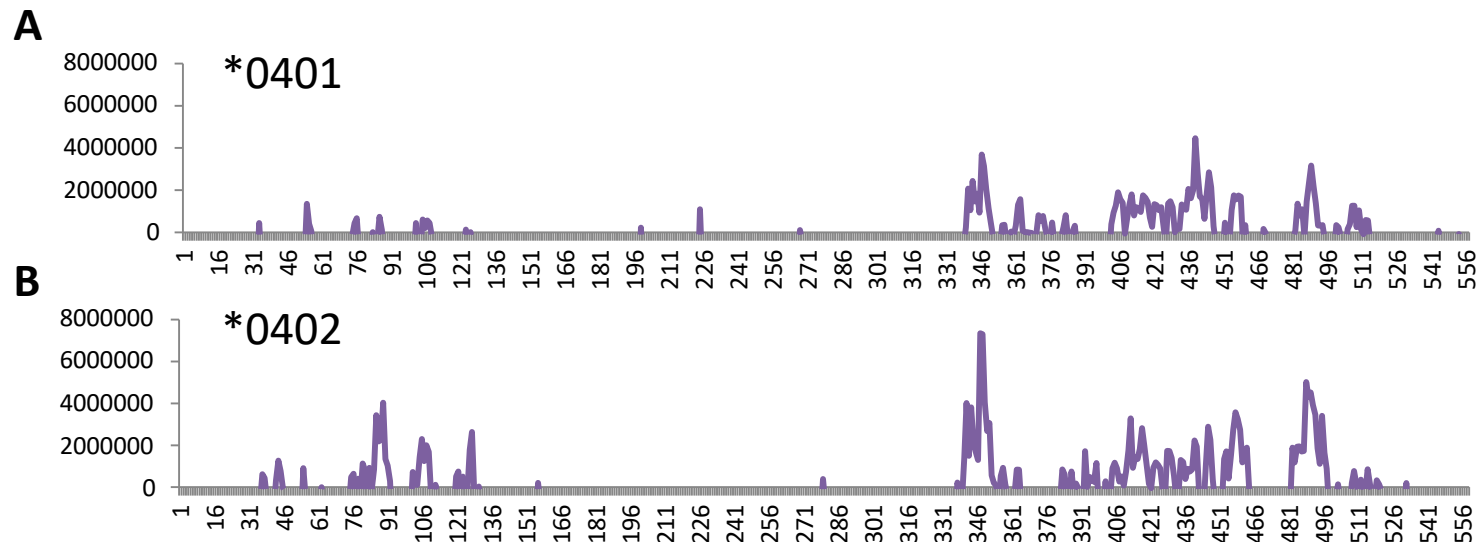

Pooled sera, collected 3 weeks after vaccination, from HLA-transgenic mice were used to measure the anti-H3 influenza antibodies. Antibodies responses against the MS/85 peptides are indicated by the blue lines and indicate the presence of linear B-cell epitopes. The linear antibody epitopes recognized by A) DRB1\*0401 and B) DRB1-\*0402 mice, N=5/group.

### Supplementary Figure 3

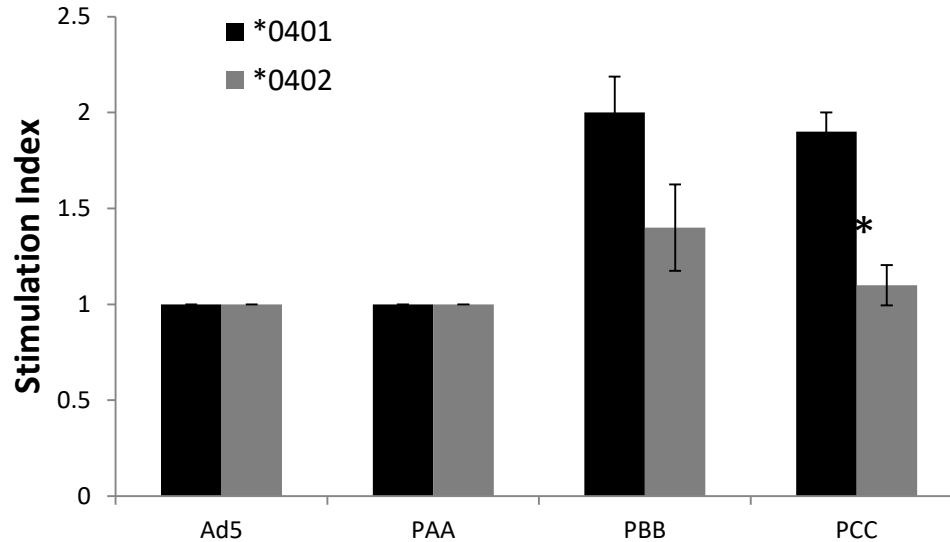

Bone marrow cells harvested from transgenic mice were cultured for 5 days in medium (RPMI1640 containing 1% penicillin-streptomycin and supplements) with GM-CSF (10ng/ml) and IL-4 (1 ng/ml) for maturation of dendritic cells (DCs). After 5 day culture, mature CD11C<sup>+</sup> DC were cultured with splenic CD4 T cells isolated by positive selection (Miltenyi Biotech) and T cell proliferation was measured, \*P<0.01 Peptides for H3N2 were not tested.

## Supplementary Figure 4

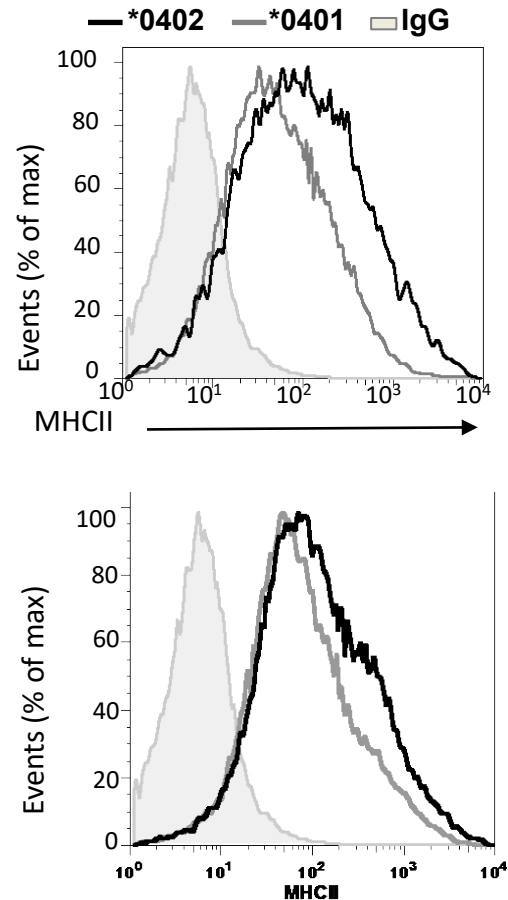

Flow cytometry-based expression of DR in BMDCs in \*0401 and \*0402 mice. Cells were cultured with conjugated anti-DR antibodies (L227) and expression analyzed by Flow cytometry. IgG was used as isotype control. Set of 2 experiments is shown

## Supplementary Figure 5

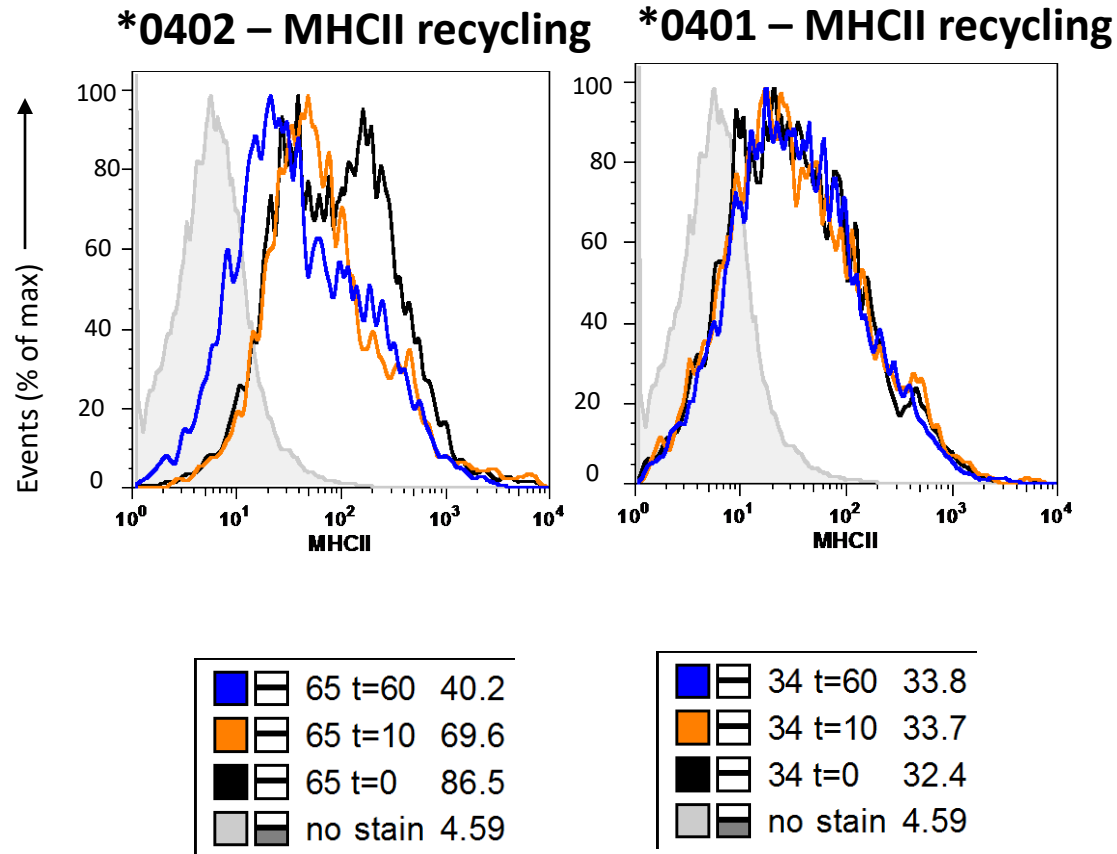

Measurement of the surface recycling of MHCII molecules in BMDCs isolated from \*0401 and \*0402 mice. Cells were cultured with conjugated anti-DR antibodies (L227) and expression analyzed by Flow cytometry. Peak MFI provided. IgG was used as isotype control. Acid stripping method was used to determine recycling

## Supplementary Figure 6

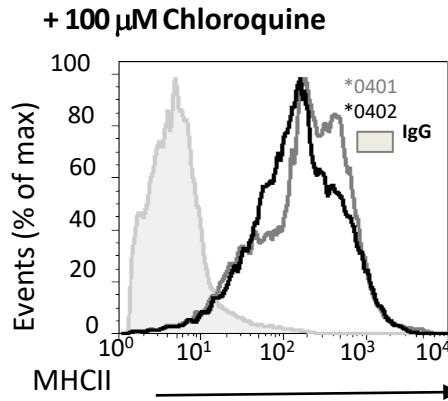

MHCII recycling in BMDCs treated with lysosome inhibitor, Chloroquine. BMDCs were cultured in the presence of Chloroquine and acid stripping method was used for recycling.

## Supplementary Figure 7

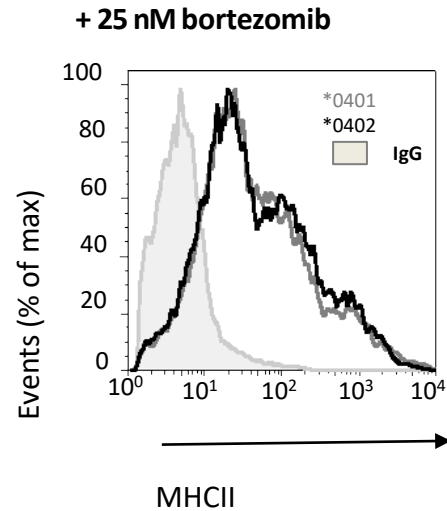

BMDCs were cultured in presence of Bortezomib and MHCII recycling was determined by FACS using acid stripping method and staining with conjugated L227 (anti-DR antibodies).



## Supplementary Figure 8

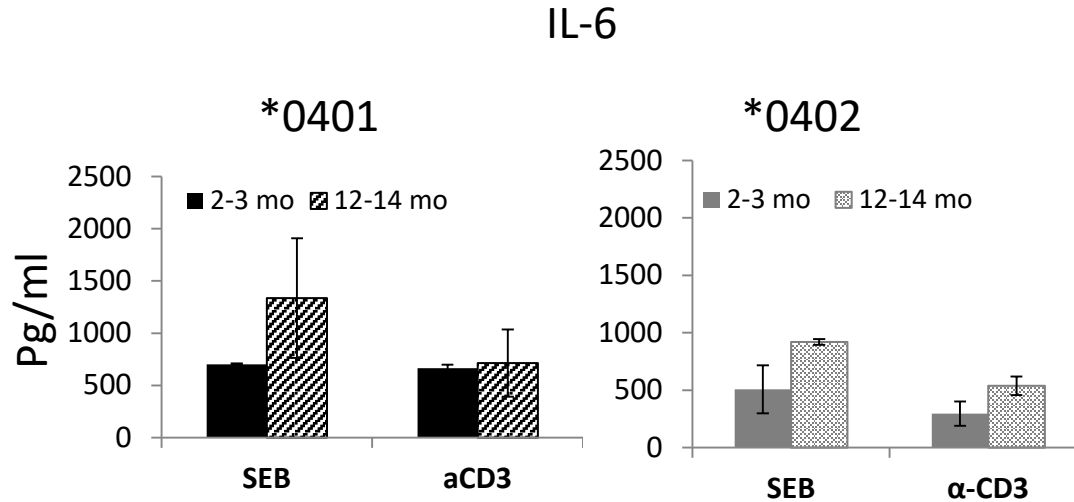

T cell response to TCR independent (Staphylococcus enterotoxin B (SEB) and TCR-dependent ( $\alpha$ -CD3) (N=3 mice/strain/time point) of splenocytes harvested from naïve mice at indicated time points and IL-6 measured in the supernatant.
